# Supplementary material
Source: PubMed Central journal article supplement (PMC2750047)
Supplement: embor2009150-s1.pdf [file embor2009150-s1.pdf]

## Supplementary Information

### *Supplementary Experimental Methods*

#### Materials

Except where indicated otherwise, all fine chemicals were purchased from Sigma-Aldrich. Synthetic peptides were obtained from the Peptide Synthesis Laboratory at Cancer Research UK (London Research Institute). DNA plasmid pACYC-14-3-3zeta was kindly provided by Alastair Aitken (University of Edinburgh).

#### Peptide sequences

Peptide sequences are shown below from amino to carboxy terminus with pS denoting phosphorylated serine in single letter amino acid code:

PKCεV3-b-pS346-pS368: Biotin-DRSKpSAPTSPCDQEIKELENNIRKALpSFDNR

PKCεV3-n: DRSKSAPTSPCDQEIKELENNIRKALSFDNR

PKCεV3-pS346: DRSKpSAPTSPCDQEIKELENNIRKALSFDNR

PKCεV3-pS368: DRSKSAPTSPCDQEIKELENNIRKALpSFDNR

PKCεV3-pS346-pS368: DRSKpSAPTSPCDQEIKELENNIRKALpSFDNR

PKCεV3-pS346-pS350-pS368: DRSKpSAPTpSPCDQEIKELENNIRKALpSFDNR

PKCεV3-pS346-G6-pS368: DRSKpSAPTGGGGGGRKALpSFDNR

PKCεV3-pS346-G10-pS368: DRSKpSAPTGGGGGGGGGGRKALpSFDNR

PKCεV3-pS346-G14-pS368: DRSKpSAPTGGGGGGGGGGGGGGRKALpSFDNR

PKCεV3-site1-site1: DRSKpSAPTSPCDQEIKELENNIRSKpSAPNR

PKCεV3-site2-site2: DRKALpSFDTSPCDQEIKELENNIRKALpSFDNR

#### **Stoichiometry of 14-3-3ζ:PKCεV3-b-pS346-pS368**

Stoichiometry of binding was determined using the EZ Biotin Quantitation Kit (Pierce). Because HABA absorbs at 500 nm wavelength only when bound to avidin, displacement of HABA by biotinylated peptide binding to avidin allowed calculation of the 14-3-3ζ:PKCεV3-b-pS346-pS368 ratio by measurement of decrease in HABA absorbance at 500 nm. Quantitation was achieved by taking absorbance measurements at 500 nm, subtraction from reference sample, and calculation of the biotin to protein ratio.

#### **Isothermal Titration Calorimetry**

Data were fitted using a single site binding model for all peptides except PKCεV3-pS346-pS346 which was fitted with a two site model. The single site model was used for other di-phosphorylated peptides because low binding heats precluded accurate determination of the second enthalpy changes and dissociation constants.

## Supplementary Table

**Table S1: Data collection and refinement statistics**

|                                            |                                         |
|--------------------------------------------|-----------------------------------------|
| X-ray source                               | Rigaku MicroMax-007 HF                  |
| Wavelength ( $\text{\AA}$ )                | 1.54179                                 |
| Temperature (K)                            | 100                                     |
| Space group                                | P2 <sub>1</sub>                         |
| Cell dimensions a, b, c ( $\text{\AA}$ )   | 71.13, 78.16, 108.52                    |
| $\alpha$ , $\beta$ , $\gamma$ ( $^\circ$ ) | 90, 90.098, 90                          |
| Resolution ( $\text{\AA}$ )                | 24.5 - 2.25 (2.45 - 2.25)               |
| Unique reflections                         | 56277 (9922)                            |
| Completeness (%)                           | 99.4 (82.4)                             |
| Redundancy                                 | 4.9 (4.8)                               |
| I/ $\sigma$                                | 19.4 (3.9)                              |
| R <sub>sym</sub> (%) <sup>a</sup>          | 10.2 (40.6)                             |
| Refined twin fraction (Xtrriage estimates) | 44.2% (H-test 42%, Britton 41%, ML 35%) |
| Twinning operator                          | h, -k, -l                               |
| R <sub>work</sub> (%) <sup>b</sup>         | 17.9                                    |
| R <sub>free</sub> (%) <sup>c</sup>         | 23.5                                    |
| Mean B-Factors ( $\text{\AA}^2$ )          |                                         |
| Wilson                                     | 39.6                                    |
| Protein                                    | 31.5                                    |
| Solvent                                    | 35.0                                    |
| Ramachandran Plot (%)                      |                                         |
| Favoured                                   | 94.6                                    |
| Allowed                                    | 3.8                                     |
| Outliers                                   | 1.6                                     |
| Rmsd from Target Geometry                  |                                         |
| Bond lengths ( $\text{\AA}$ )              | 0.006                                   |
| Bond angles ( $^\circ$ )                   | 0.978                                   |
| PDB ID                                     | 2WH0                                    |

<sup>a</sup>R<sub>sym</sub> =  $\sum |I_j - \langle I \rangle| / \sum I_j$  where  $I_j$  is the individual reflection intensity and  $\langle I \rangle$  is the average intensity of that reflection.

<sup>b</sup>R<sub>work</sub> =  $\sum ||F_o| - |F_c|| / \sum |F_c|$  where  $F_o$  is the observed structure factor amplitude and  $F_c$  is the structure factor amplitude calculated from the structure.

<sup>c</sup>R<sub>free</sub> is calculated identically to R<sub>work</sub> but with 5.0% of randomly chosen reflections omitted from the refinement.

Data for the outermost shell are in parentheses, one crystal was used for data collection.

## Supplementary Figures

Figure S1

Kostecky et al. 2009

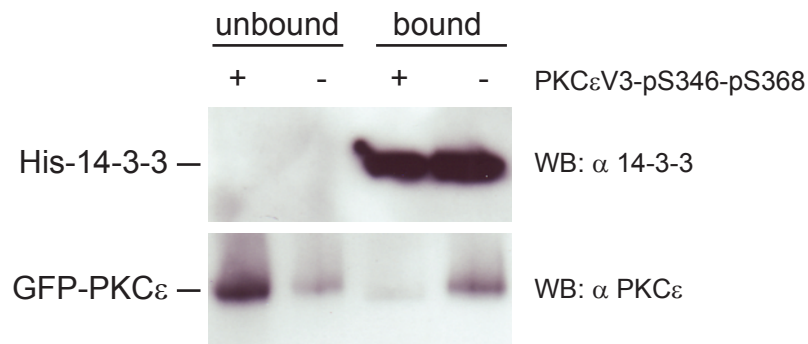

**Figure S1:** The peptide PKC $\epsilon$ V3-pS346-pS368 competes with PKC $\epsilon$  for 14-3-3 binding. Hexahistidine tagged 14-3-3 $\zeta$  (His-14-3-3) was bound to nickel-nitrilotriacetic acid (Ni-NTA) resin and used as an affinity matrix to pulldown of GFP-PKC $\epsilon$  from phorbol-12-myristate-13-acetate stimulated HEK-293 cells. Excess peptide PKC $\epsilon$ V3-pS346-pS368 was added to half of the Ni-NTA resin after the pulldown, while buffer was added to the other half as a control. The supernatants were collected and are labelled 'unbound' in the Western Blots above. The proteins which remained bound were then eluted from the Ni-NTA resin by addition of 300 mM imidazole (labelled 'bound' in Western Blots).

Figure S2

Kostecky et al. 2009

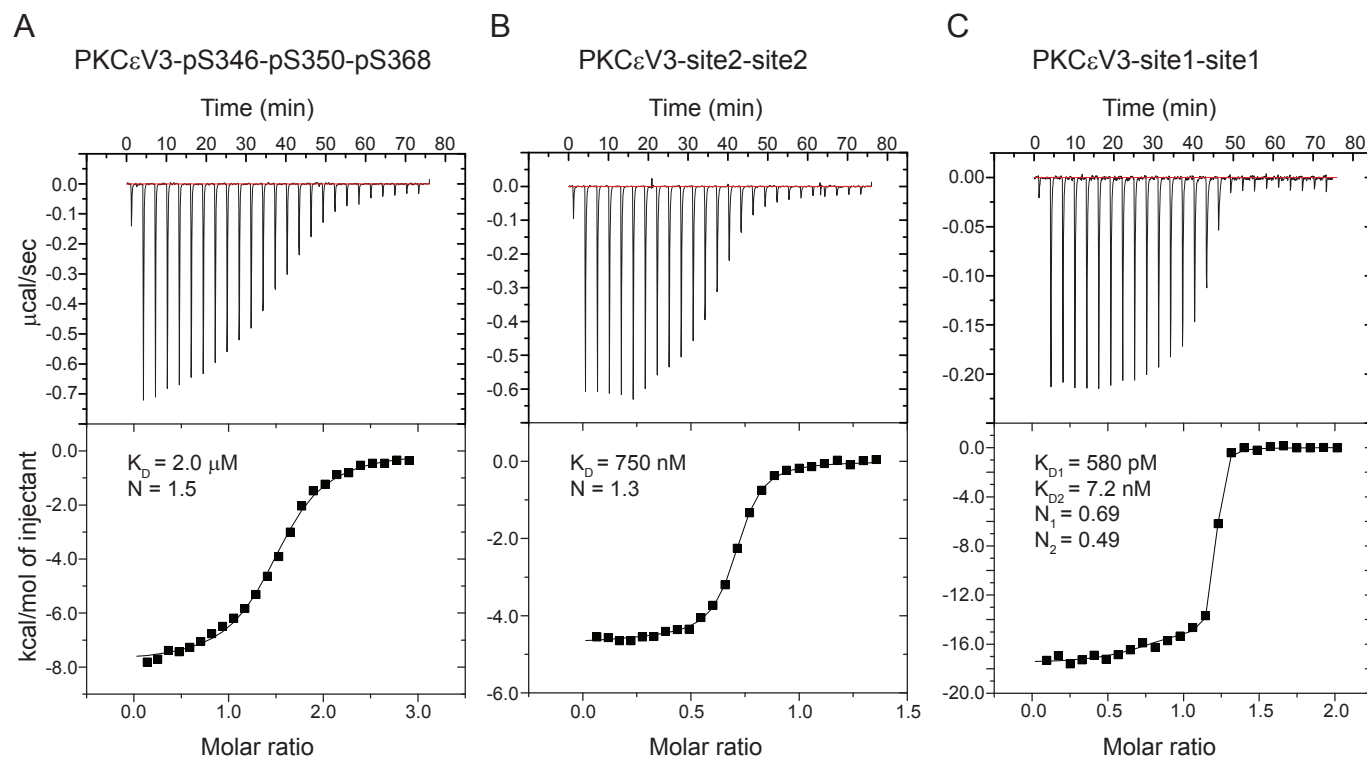

**Figure S2:** Isothermal titration calorimetry (ITC) binding curves for tri-phosphopeptide and di-phosphopeptides. Top panels show raw ITC data, bottom panels show binding curves fitted with a one site binding model for PKC $\epsilon$ -pS346-pS350-pS368 and PKC $\epsilon$ V3-site2-site2. The curve for PKC $\epsilon$ V3-site1-site1 was fitted with a two binding site model. Data shown are representative of three experiments with independent samples.

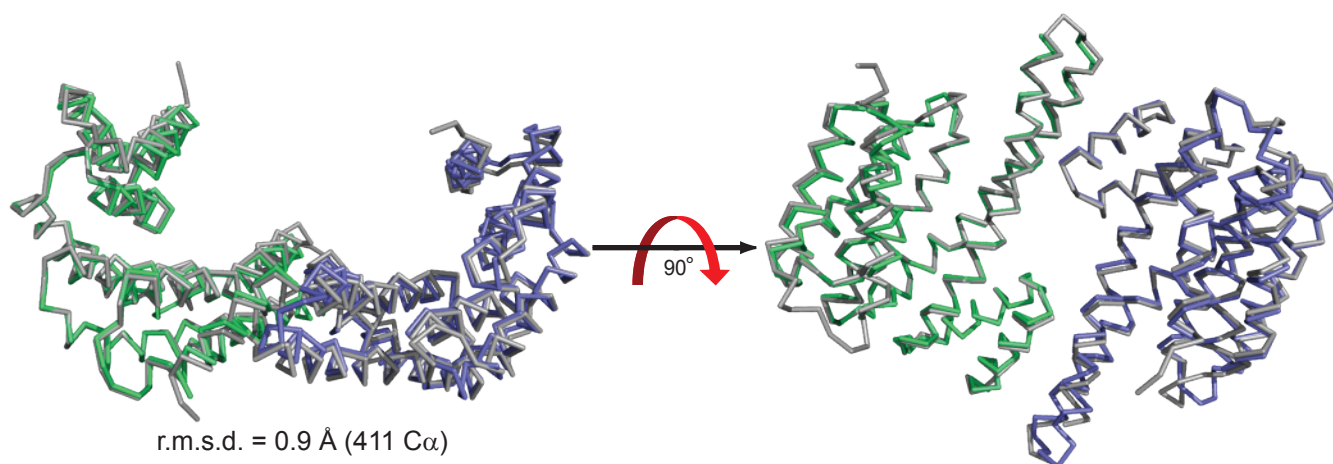

**Figure S3:** Comparison of 14-3-3 $\zeta$ :PKC $\epsilon$ V3 structure to mode 1-bound 14-3-3 $\zeta$ . The previously reported structure for 14-3-3 $\zeta$  bound to a canonical mode 1 peptide (PDB ID 1QJB) is shown in grey. Chains A and B of PKC $\epsilon$ V3-bound 14-3-3 $\zeta$  are shown in green and blue, respectively. The figure was prepared using PyMOL (Delano, 2002).

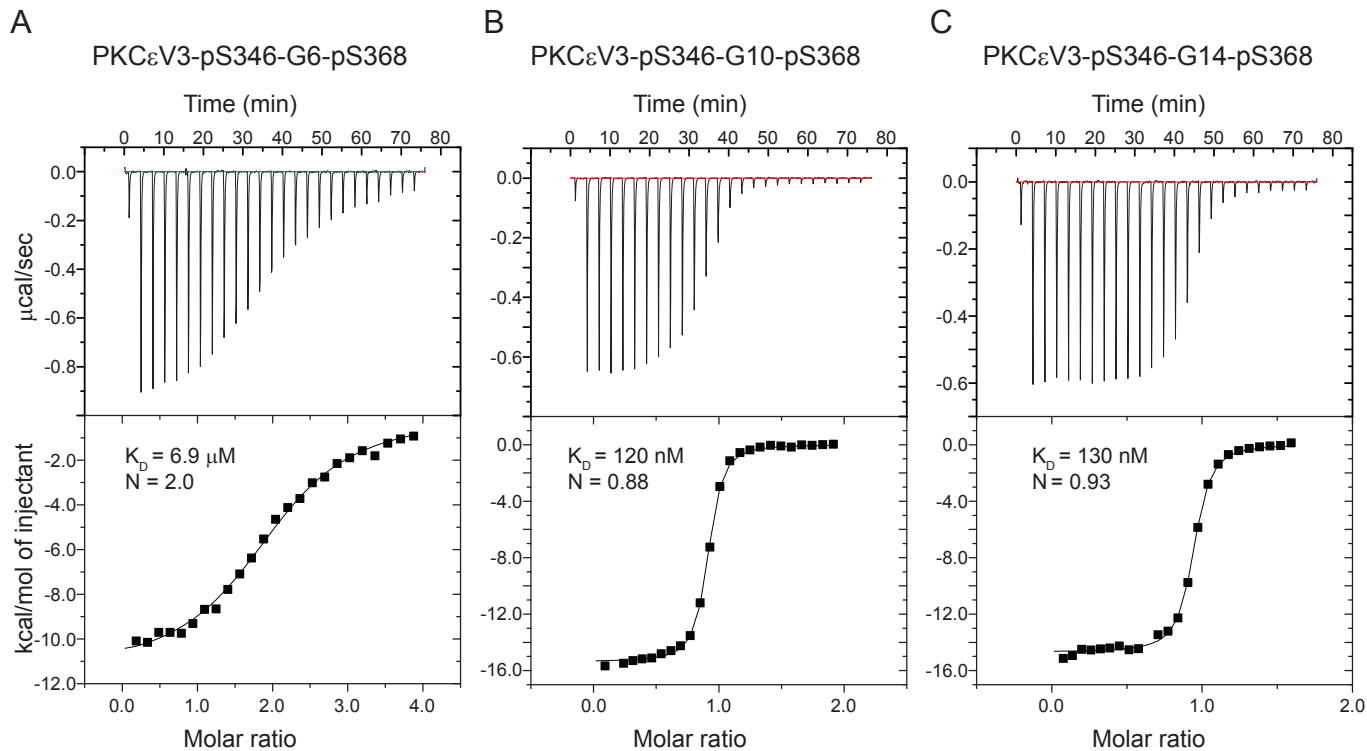

**Figure S4:** Isothermal titration calorimetry binding curves for peptides with varied linker length. Peptides contained both PKC $\epsilon$ V3 14-3-3 binding sites with polyglycine linkers of length 6, 10 and 14 glycine residues, respectively. Top panels show raw data for binding of the peptides to 14-3-3, bottom panels show binding curves fitted with a one site binding model. Data shown are representative of three experiments with independent samples.
